# Supplementary material
Source: PubMed Central journal article supplement (PMC1779719)
Supplement: jphysiol_2006.108332_1.pdf [file jphysiol_2006.108332_1.pdf]

## Data Supplement

| Channel (n)          | Inactivation                          |                                        | Activation            |            | E <sub>rev</sub> (mV) |
|----------------------|---------------------------------------|----------------------------------------|-----------------------|------------|-----------------------|
|                      | V <sub>0.5</sub> (mV)                 | k (mV)                                 | V <sub>0.5</sub> (mV) | k (mV)     |                       |
| wt hERG (9)          | -73.9 ± 3.9                           | -29.9 ± 1.3                            | -16.9 ± 1.8           | 8.2 ± 0.3  | -94 ± 1.1             |
| wt hEAG (4)          | *                                     | *                                      | nd                    | nd         | nd                    |
| wt rELK2 (5)         | +31.8 ± 3.4                           | -9.2 ± 1.7                             | nd                    | nd         | -85 ± 3.9             |
| hERG/hEAG S5P (5)    | -57.4 ± 4.1                           | -30.8 ± 1.6                            | -12.6 ± 2.6           | 9.2 ± .03  | -93 ± 3.7             |
| hERG/rELK2 S5P (4)   | +27.3 ± 0.3                           | -34.4 ± 1.2                            | -12.8 ± 0.5           | 6.7 ± 0.1  | -87 ± 2.5             |
| hERG N588E (5)       | -109 ± 5.2                            | -17.3 ± 1.5                            | -11.9 ± 1.6           | 9.6 ± .05  | -98 ± 1.8             |
| hERG D591R/Q592R (5) | +28.7 ± 3.3                           | -10.2 ± 1.4                            | -13.2 ± 9.9           | 5.7 ± 1.8  | -89 ± 4.4             |
| rELK2/hERG S5P (5)   | -80.0 ± 4.2<br>+28.5±2.2 <sup>†</sup> | -22.6 ± 2.3<br>-8.7 ± 4.1 <sup>†</sup> | nd                    | nd         | -99 ± 3.5             |
| hERG H587K (4)       | -102 ± 0.6                            | -23.5 ± 1.0                            | -23.7 ± 1.0           | 7.2 ± 0.3  | -97 ± 1.1             |
| hERG N588K (5)       | 66.2 ± 11                             | -17.1 ± 2.3                            | -2.3 ± 2.9            | 14.3 ± 0.6 | -96 ± 1.6             |
| hERG D591K (4)       | 12.3 ± 3.0                            | -21.0 ± 0.7                            | -27.8 ± 2.0           | 8.3 ± 0.8  | -97 ± 0.8             |
| hERG Q592K (4)       | 52.9 ± 4.4                            | -22.6 ± 1.2                            | -7.1 ± 1.0            | 7.4 ± 0.2  | -90 ± 0.4             |
| hERG H587D (4)       | -87.6 ± 3.1                           | -27.5 ± 1.0                            | -31.3 ± 1.3           | 7.1 ± 0.1  | -98 ± 0.4             |
| hERG N588D (4)       | -108 ± 1.9                            | -23.1 ± 0.8                            | -25.5 ± 0.5           | 8.1 ± 0.4  | -97 ± 1.1             |
| hERG D591Q (10)      | -72.0 ± 2.8                           | -30.2 ± 2.1                            | -13.0 ± 1.8           | 9.2 ± 0.1  | -82 ± 0.9             |
| hERG Q592D (6)       | -63.4 ± 5.4                           | -27.3 ± 1.2                            | -28.9 ± 1.2           | 8.0 ± 0.6  | -97 ± 0.6             |

\* wt hEAG channels do not inactivate

† rELK2/hERG S5P channels exhibit two components for steady-state inactivation (see text for details)

nd not determined
